# Supplementary material for: Chemical Property Evaluation and Tensile Strength Correlation of XLPE Insulators Based on Accelerated Thermal Aging
Source: MDPI journal article supplement (doi:10.3390/app131810516), 2023-09-21
Supplement: s1 [file s1]

Supplementary information

## **Chemical property evaluation and tensile strength correlation of XLPE insulators based on accelerated thermal aging**

**Byeong Sub Kwak <sup>1</sup>, Taehyun Jeon <sup>1</sup>, Ah-Reum Kim <sup>1</sup>, Eunyoung Kim <sup>1</sup>, Jae-Kon Kim <sup>2</sup>, Youngje Min <sup>2</sup>, and Hyunjo Park <sup>1,\*</sup>**

<sup>1</sup> Korea Electric Power Research Institute, Korea Electric Power Corporation, 105, Munji-Ro, Yuseong-Gu, Daejeon, 34056, Republic of Korea; bskwak0315@kepco.co.kr (B.S.K.), sweet@kepco.co.kr (T.J.), ar.kimkim@kepco.co.kr (A.K.), ekim123@kepco.co.kr (E.K.), htpark123@kepco.co.kr (H.P.)

<sup>2</sup> Research Institute of Future Technology, Korea Petroleum Quality & Distribution Authority, 33, Yangheong 3-gil, Ochang-eup, Cheongwon-gu, Cheongju-si, Chungcheongbuk-do, 28115, Republic of Korea; jkkim@kpetro.or.kr (J.K.), min12you@kpetro.or.kr (Y.M.)

### **Corresponding Author**

\* Tel. : +82-42-865-5464, E-mail : htpark123@kepco.co.kr

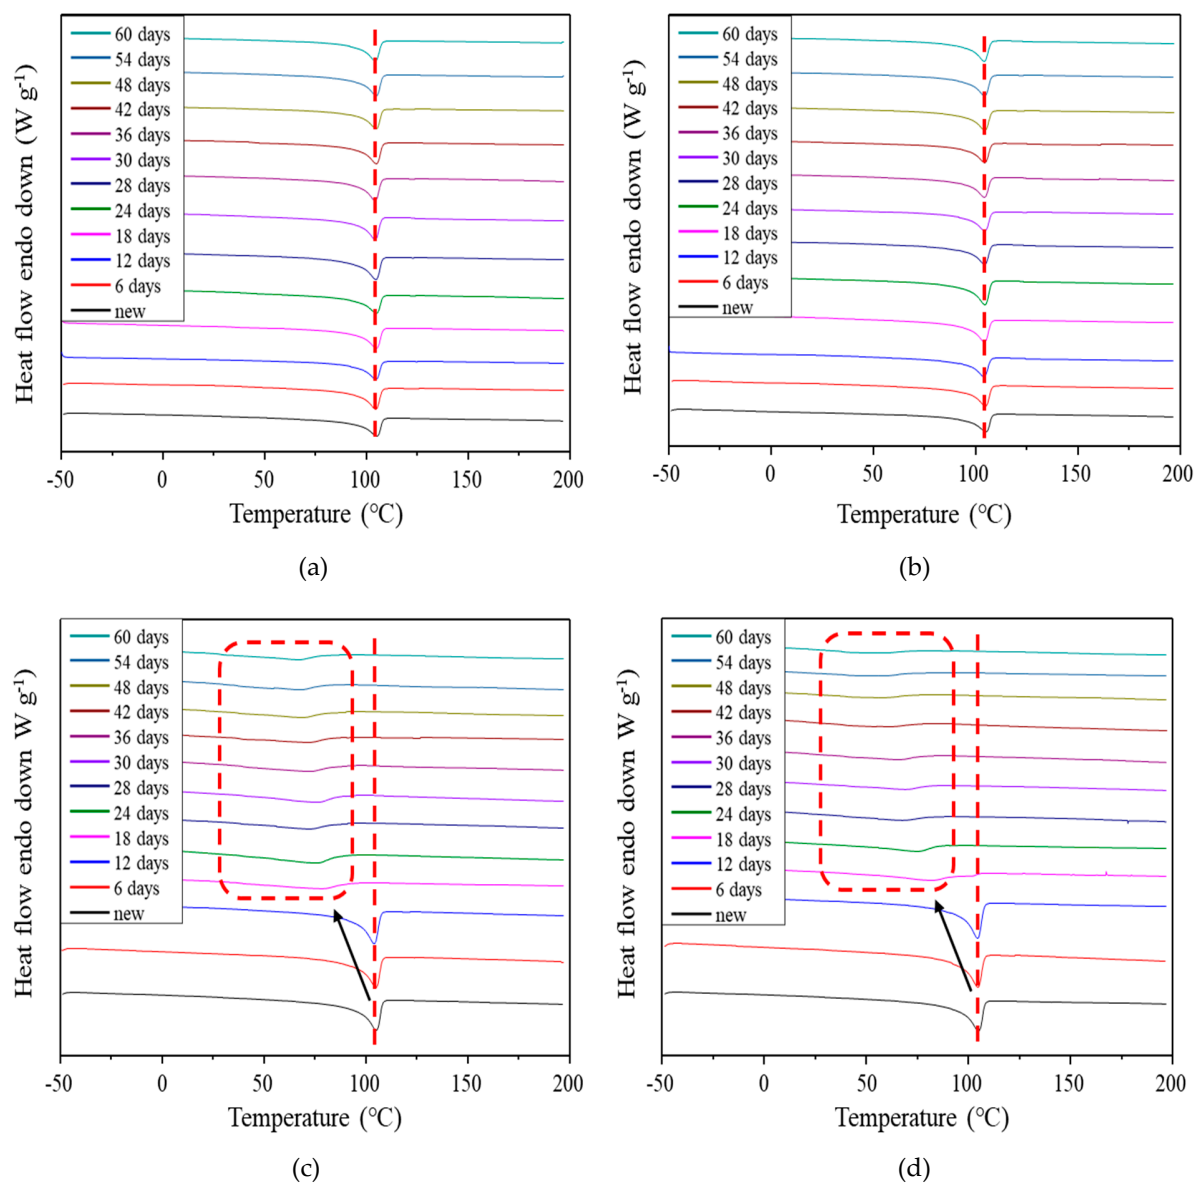

**Figure S1.** DSC heating thermograms of XLPE samples depending on aging time and temperature: (a) 100  $^{\circ}\text{C}$ , (b) 120  $^{\circ}\text{C}$ , (c) 140  $^{\circ}\text{C}$ , and (d) 160  $^{\circ}\text{C}$ .

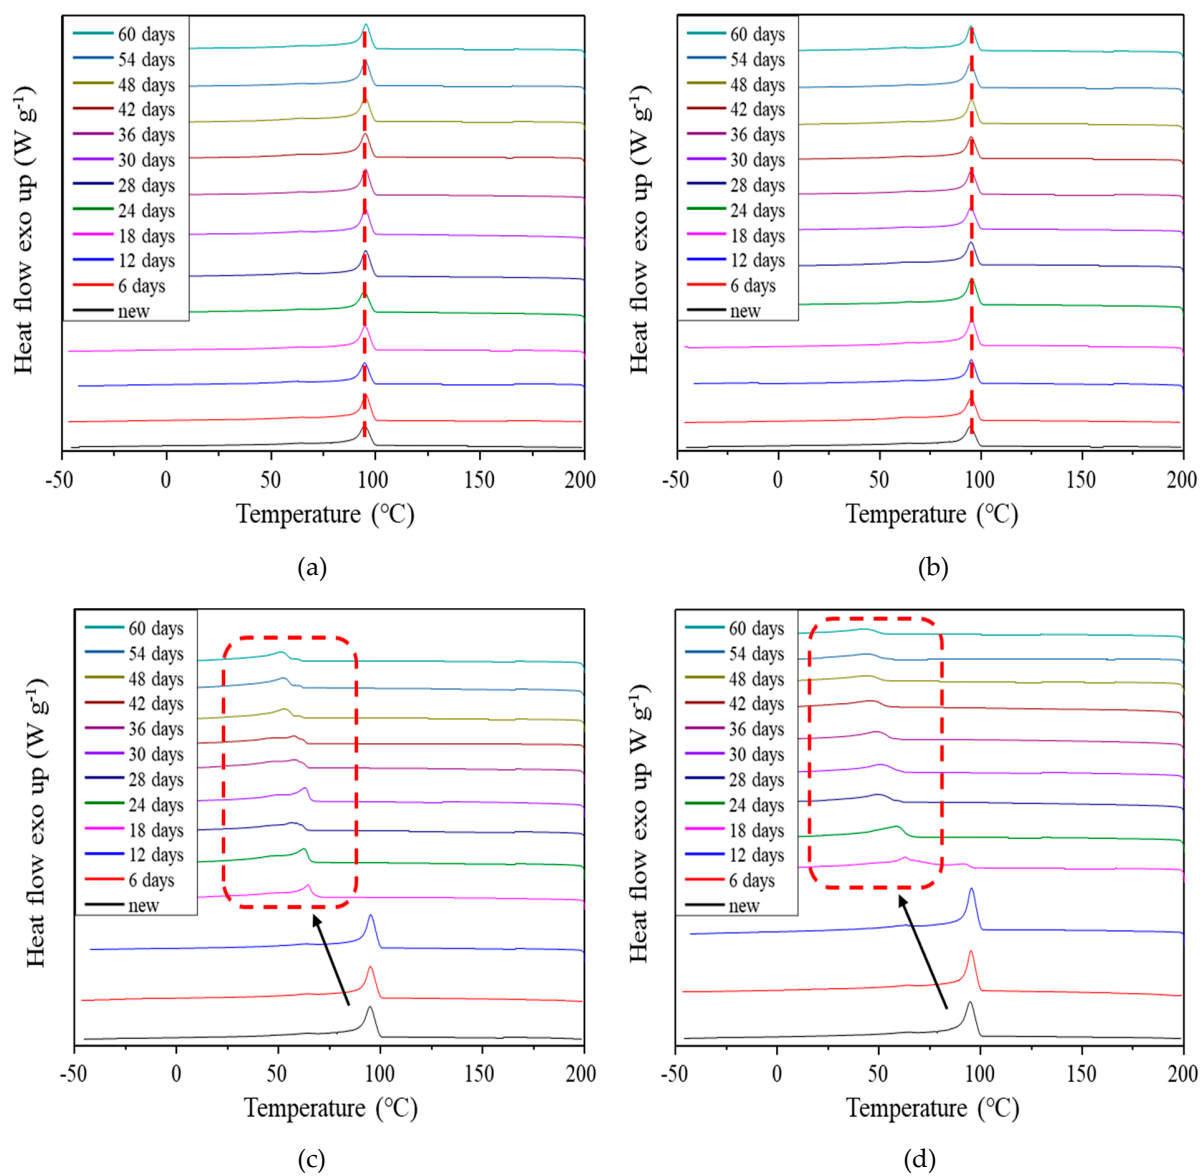

**Figure S2.** DSC cooling thermograms of XLPE samples based on aging time and temperature: (a) 100  $^{\circ}\text{C}$ , (b) 120  $^{\circ}\text{C}$ , (c) 140  $^{\circ}\text{C}$ , and (d) 160  $^{\circ}\text{C}$ .

**Table S1.** The correlation parameters between tensile strength and factors.

| Factor                      |                         | Linear correlation<br>$y = ax + b$ |                   |        | Nonlinear correlation<br>$y = y_0 + Ae^{R_0x}$ |           |         |        |
|-----------------------------|-------------------------|------------------------------------|-------------------|--------|------------------------------------------------|-----------|---------|--------|
|                             |                         | Slope ( $a$ )                      | Intercept ( $b$ ) | $R^2$  | $y_0$                                          | $A$       | $R_0$   | $R^2$  |
| Degree of crystallinity (%) | XRD                     | 0.6012                             | -0.9287           | 0.8747 | -144.8360                                      | 144.4418  | 0.0038  | 0.8721 |
|                             | DSC                     | 0.5123                             | 1.7047            | 0.8323 | 90.1234                                        | -89.0333  | -0.0066 | 0.8296 |
| Carbonyl index              | CI-1                    | -2.8910                            | 21.9396           | 0.9214 | -7.552                                         | 30.7712   | -0.1456 | 0.9299 |
|                             | CI-2                    | -33.9917                           | 21.1087           | 0.8808 | 0.7634                                         | 22.6265   | -3.2574 | 0.9221 |
| Yellowness index            | ASTM D1925              | -0.0920                            | 24.4677           | 0.8412 | -0.2756                                        | 31.4387   | -0.0080 | 0.8695 |
|                             | $T_m$ (°C)              | 0.3302                             | -15.0430          | 0.8967 | -2.6902                                        | 2.0859    | 0.0227  | 0.9121 |
|                             | $T_c$ (°C)              | 0.2490                             | -4.2002           | 0.7963 | -579.9495                                      | 576.0074  | 0.0004  | 0.7917 |
|                             | Lamellar thickness (nm) | 3.6550                             | -6.7180           | 0.9250 | -36.0981                                       | 32.5561   | 0.0747  | 0.9244 |
|                             | Band gap (eV)           | 11.1839                            | -17.8268          | 0.8386 | 33.4518                                        | -104.9198 | -0.6071 | 0.8581 |
|                             | Degree of swelling (%)  | 22.1984                            | -0.2981           | 0.8090 | 4.9248                                         | 28.3420   | -0.0582 | 0.8888 |
